# Supplementary material
Source: PubMed Central journal article supplement (PMC2657432)
Supplement: 0803229106_0803229106SI.pdf [file 0803229106_0803229106SI.pdf]

# Supporting Information

Hussain *et al.* 10.1073/pnas.0803229106

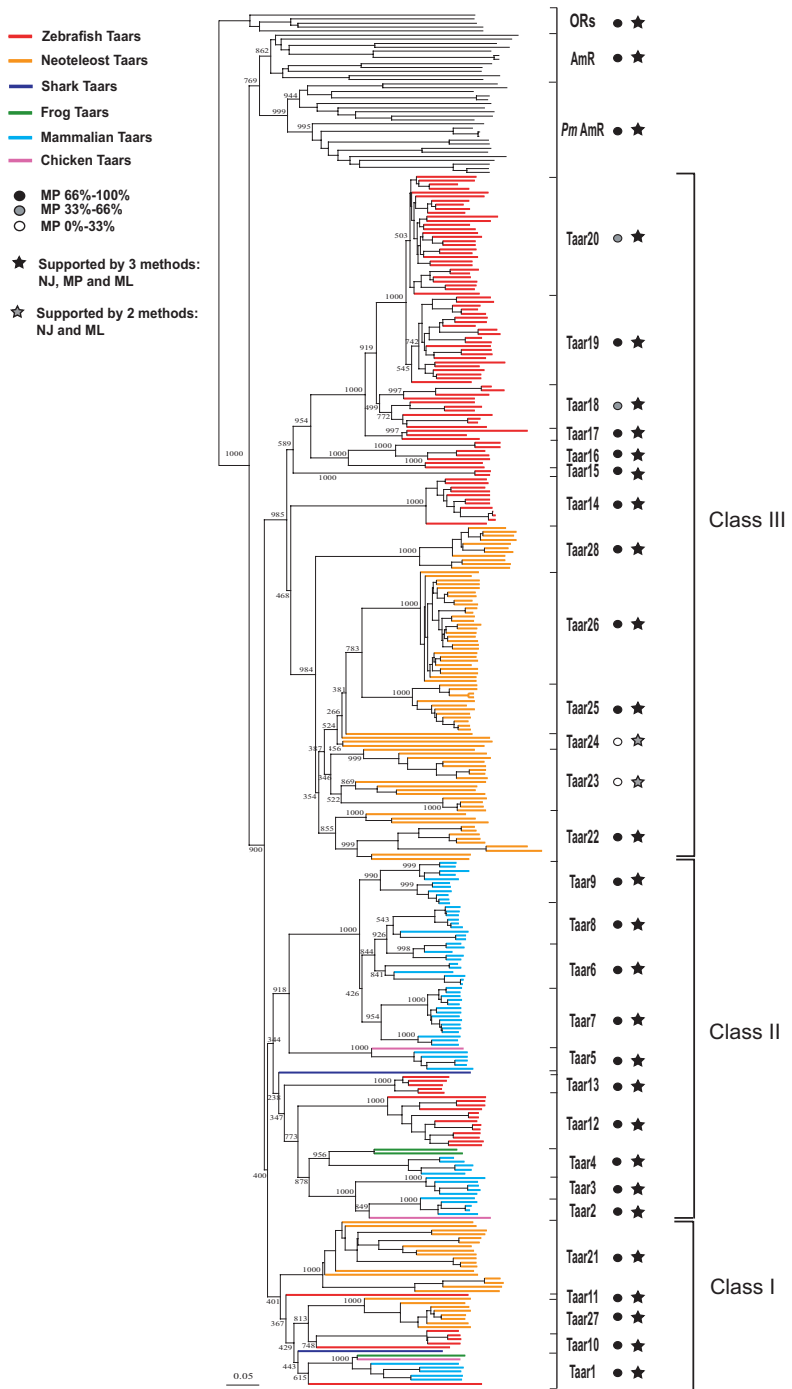

**Fig. S1.** Phylogenetic tree of the *taar* genes. The cladogram shown here corresponds to the unrooted tree in Fig. 1. The tree is constructed by using the neighbor-joining algorithm; bootstrap support at major nodes is indicated by numbers (1,000 cycles). All subfamilies are supported by all 3 tree algorithms used (neighbor joining; maximum parsimony, 100 bootstraps; maximum likelihood), except subfamilies 23 and 24 (supported by 2 methods). Red lines represent zebrafish *taar* genes; orange lines, neoteleost *taar* genes; dark blue, cartilaginous fish *taar* genes; green, amphibian *taar* genes; light-blue, mammalian *taar* genes; and black represents the outgroup (OR, odorant receptors; AmR, aminergic receptors; PmAmR, *Petromyzon marinus* (sea lamprey) aminergic receptors). Note the segregation in 3 clades, class I to III.



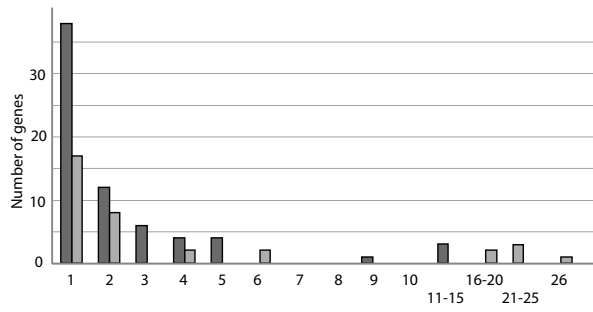

**Fig. S3.** Correlation of phylogenetic distance with physical distance in 2 zebrafish genomic clusters. For each gene within the clusters on chromosome 10 (dark gray bars) and chromosome 20 (light gray bars), the paralog with the highest homology was determined, and its position relative to the first gene was expressed as ordinal value, e.g., a value of 1 indicates a direct neighbor (most frequent case), and a value of 2 indicates 1 additional gene situated between the gene and its closest relative. Phylogenetic neighbors outside of the cluster occur only in 2 cases.

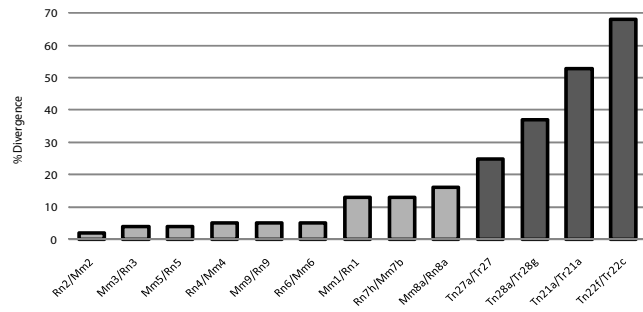

**Fig. S4.** Maximal divergence within rodent and pufferfish subfamilies. Bars show maximal divergence between ortholog genes in rat vs. mouse and tetraodon vs. fugu comparisons. Values are based on amino acid comparisons and ordered by size. Note that even the largest value for rodent comparisons is well below the smallest value for pufferfish comparisons.
