# Supplementary material
Source: PubMed Central journal article supplement (PMC2657432)
Supplement: 0803229106_ST1_PDF.pdf [file 0803229106_ST1_PDF.pdf]

**Table S1. Number of *taar* genes and subfamilies in all species analyzed**

| Species                       | Subfamilies |                  | Number of <i>taar</i> genes |        |
|-------------------------------|-------------|------------------|-----------------------------|--------|
|                               | Number      | Name             | Intact (Class I, II & III)  | Pseudo |
| Zebrafish                     | 12          | 1, 10-20         | 112 (7, 18, 87)             | 4      |
| Stickleback                   | 7           | 21-27            | 48 (4, 0, 44)               | 0      |
| Medaka                        | 4           | 21-24            | 25 (6, 0, 19)               | 1      |
| Opossum                       | 7           | 1-6, 9           | 19 (1, 18, 0)               | 0      |
| <i>Takifugu rubripes</i>      | 4           | 21, 22, 27, 28   | 18 (7, 0, 11)               | 0      |
| <i>Tetraodon nigroviridis</i> | 4           | 21, 22, 27, 28   | 18 (9, 0, 9)                | 0      |
| Rat                           | 9           | 1-9              | 17 (1, 16, 0)               | 2      |
| Mouse                         | 9           | 1-9              | 15 (1, 14, 0)               | 1      |
| Cow                           | 9           | 1-9              | 13 (1, 12, 0)               | 0      |
| Human                         | 6           | 1, 2, 5, 6, 8, 9 | 6 (1, 5, 0)                 | 3      |
| Frog                          | 2           | 1, 4             | 3 (1, 2, 0)                 | 0      |
| Chicken                       | 3           | 1, 2, 5          | 3 (1, 2, 0)                 | 0      |
| Elephant shark                | 2           | 1, 2             | 2 (1, 1, 0)                 | 0      |
| Sea lamprey                   | 0           | -                | 0                           | 0      |

First column, name of species; second column, number of subfamilies per species; third column, subfamily names, e.g., 10-20 means TAAR10 to TAAR20; fourth column, number of intact *taar* genes per species, numbers for each class given in parentheses; fifth column, number of pseudogenes.
