# Supplementary material
Source: PubMed Central journal article supplement (PMC2657432)
Supplement: 0803229106_ST2_PDF.pdf [file 0803229106_ST2_PDF.pdf]

**Table S2. List of all *taar* and outgroup genes**

| Gene Name  | Synonyms | Chromosome | Location            | Accession number   | EST        |
|------------|----------|------------|---------------------|--------------------|------------|
| Dr_Taar1   | zTA1b    | 20         | 54463291-54464289   | ENSDART00000060779 | OE & Brain |
| Dr_Taar10  |          | 20         | 54426459-54427487   | ENSDART00000014396 | OE         |
| Dr_Taar10a |          | 20         | 54432894-54433904   | ENSDART00000060795 | OE         |
| Dr_Taar10b |          | 20         | 54453770-54454780   | ENSDART00000060783 | OE         |
| Dr_Taar10c |          | 20         | 54436728-54437738   | ENSDART00000060791 | Embryo     |
| Dr_Taar10d |          | 20         | 54445152-54446162   | ENSDART00000060787 | OE         |
| Dr_Taar11  | zTA1a    | 20         | 54458998-54459981   | ENSDART00000007567 | OE         |
| Dr_Taar12a |          | 20         | 46086903-46088501   |                    | Brain & OE |
| Dr_Taar12b | zTA69    | 20         | 54490233-54491246   | ENSDART00000060770 | Brain & OE |
| Dr_Taar12c |          | 20         | 54486762-54487778   | ENSDART00000060773 | Brain & OE |
| Dr_Taar12d | zTA71    | 20         | 46067894-46068859   |                    | Brain & OE |
| Dr_Taar12e |          | 20         | 54530232-54531245   | ENSDART00000060758 | OE & Brain |
| Dr_Taar12f | zTA72    | 20         | 54517187-54518200   | ENSDART00000060763 | OE & Brain |
| Dr_Taar12g |          | 20         | 54522272-54523282   | ENSDART00000037777 | OE & Brain |
| Dr_Taar12h |          | 20         | 54538161-54539195   | ENSDART00000060754 | Brain & OE |
| Dr_Taar12i |          | 20         | 54477413-54478435   | ENSDART00000060778 | OE         |
| Dr_Taar12j |          | 20         | 54545123-54546145   | ENSDART00000060750 | Brain & OE |
| Dr_Taar12k | zTA73    | 20         | 216108-217142       |                    | OE & Brain |
| Dr_Taar12l |          | 20         | 14367272-14368479   | ENSDART00000064810 | OE         |
| Dr_Taar12m |          | 15         | 2549861-2551166     | ENSDART00000063348 | OE         |
| Dr_Taar13a |          | 10         | 54414291 - 54415313 |                    | Brain      |
| Dr_Taar13b | zTA64    | 20         | 54407350-54408375   | ENSDART00000060799 | Brain      |
| Dr_Taar13c | zTA65    | 20         | 54388665-54389690   | ENSDART00000060803 | Brain      |
| Dr_Taar13d |          | 20         | 54399225-54400250   | ENSDART00000060800 | Embryo     |
| Dr_Taar13e | zTA66    | 20         | 54414300-54419192   | ENSDART00000060797 | Brain      |
| Dr_Taar14a |          | 20         | 54353917-54354879   | ENSDART00000060806 | Embryo     |
| Dr_Taar14b |          | 20         | 54893962-54894948   | ENSDART00000060716 | OE         |
| Dr_Taar14c |          | 7          | 77815446-77818549   | ENSDART00000073522 | OE         |
| Dr_Taar14d | zTA70    | 20         | 54881175-54882161   | ENSDART00000060717 | OE         |
| Dr_Taar14e |          | 20         | 54858946-54859932   | ENSDART00000060724 | OE         |
| Dr_Taar14f |          | 20         | 54876107-54877093   | ENSDART00000060719 | OE         |
| Dr_Taar14g |          | 20         | 54864008-54871387   | ENSDART00000060720 | OE         |
| Dr_Taar14h |          | 20         | 54339800-54340762   | ENSDART00000060811 | OE         |
| Dr_Taar14i | zTA68    | 20         | 54335864-54336823   | ENSDART00000038379 | OE         |

|            |       |    |                    |                    |            |
|------------|-------|----|--------------------|--------------------|------------|
| Dr_Taar14j |       | 20 | 54330227-54331189  | ENSDART00000060815 | OE         |
| Dr_Taar14k | zTA67 | 20 | 54350249-54351205  | ENSDART00000060808 | OE         |
| Dr_Taar14l |       | 20 | 54345473-54346429  | ENSDART00000060810 | OE         |
| Dr_Taar15a |       | 20 | 54836241-54837227  | ENSDART00000074482 | Brain & OE |
| Dr_Taar15b |       | 20 | 54383896-54384882  | ENSDART00000060804 | Embryo     |
| Dr_Taar16a |       | 10 | 45611149-45612353  | ENSDART00000076403 | OE         |
| Dr_Taar16b |       | 10 | 45607700-45606742  | ENSDART00000076404 | Brain & OE |
| Dr_Taar16c | zTA63 | 13 | 291485-292459      |                    | Brain & OE |
| Dr_Taar16d |       | 13 | 625049-626563      | ENSDART00000082178 | OE & Brain |
| Dr_Taar16e | zTA62 | 13 | 633903-639694      | ENSDART00000082164 | Brain & OE |
| Dr_Taar16f | zTA36 | 10 | 45630716-45629785  |                    | Brain & OE |
| Dr_Taar16g | zTA35 | 10 | 45635543-45634495  | ENSDART00000076382 | Brain & OE |
| Dr_Taar17a | zTA48 | 10 | 45616694-45617728  |                    | Brain & OE |
| Dr_Taar17b | zTA47 | 10 | 45624185-45626594  | ENSDART00000062763 | OE & Brain |
| Dr_Taar17c | zTA49 | 10 | 45625665-45626648  |                    | Brain & OE |
| Dr_Taar18a |       | 10 | 45541637-45542587  | ENSDART00000030565 | OE         |
| Dr_Taar18b |       | 10 | 45575185 -45574090 | ENSDART00000085892 | OE & Brain |
| Dr_Taar18c |       | 10 | 45571055-45569948  |                    | OE & Brain |
| Dr_Taar18d | zTa28 | 10 | 45549056-45550027  | ENSDART00000085900 | Brain & OE |
| Dr_Taar18e |       | 10 | 45554908-45553862  |                    | OE & Brain |
| Dr_Taar18f | zTA61 | 10 | 45561824-45560848  | ENSDART00000076422 | Brain & OE |
| Dr_Taar18g | zTA27 | 10 | 45545167-45546210  |                    | Brain & OE |
| Dr_Taar18h | zTA18 | 10 | 45579595-45580647  |                    | Brain & OE |
| Dr_Taar18i | zTA19 | 10 | 45596234-45597303  | ENSDART00000049070 | Brain & OE |
| Dr_Taar18j | zTA20 | 10 | 45601887-45602876  |                    | Brain & OE |
| Dr_Taar18k |       | 10 | 45601833-45602894  |                    | OE & Brain |
| Dr_Taar19a |       | 10 | 46047546-46048523  | ENSDART00000062707 | OE & Brain |
| Dr_Taar19b |       | 10 | 46083909-46085495  |                    | Brain & OE |
| Dr_Taar19c | zTA54 | 10 | 46091169-46092376  | ENSDART00000043020 | Brain & OE |
| Dr_Taar19d | zTA34 | 10 | 46078311-46079177  | ENSDART00000032932 | Brain & OE |
| Dr_Taar19e |       | 10 | 46052727-46053710  | ENSDART00000076331 | OE & Brain |
| Dr_Taar19f | zTA59 | 10 | 46066316-46067266  |                    | OE & Brain |

|             |       |    |                   |                    |            |
|-------------|-------|----|-------------------|--------------------|------------|
| Dr_Taar19g  | zTA33 | 10 | 46072194-46073195 |                    | Brain & OE |
| Dr_Taar19h  | zTA50 | 10 | 45994749-45995753 | ENSDART00000080193 | Brain & OE |
| Dr_Taar19i  | zTA31 | 10 | 46041846-46042847 | ENSDART00000062696 | Brain & OE |
| Dr_Taar19j  |       | 10 | 46036393-46037382 |                    | Brain & OE |
| Dr_Taar19k  |       | 10 | 45652022-45652966 | ENSDART00000062720 | OE & Brain |
| Dr_Taar19l  | zTA32 | 10 | 45647528-45648568 | ENSDART00000040322 | OE & Brain |
| Dr_Taar19m  |       | 10 | 46000405-46001397 |                    | Brain & OE |
| Dr_Taar19n  |       | 10 | 46010425-46011423 | ENSDART00000062709 | OE         |
| Dr_Taar19o  | zTA51 | 10 | 45987464-45988465 | ENSDART00000076348 | OE & Brain |
| Dr_Taar19p  |       | 13 | 12610683-12612441 | ENSDART00000080187 | OE         |
| Dr_Taar19q  | zTA29 | 10 | 46032382-46037292 | ENSDART00000054504 | OE & Brain |
| Dr_Taar19r  |       | 10 | 45670389-45671369 | ENSDART00000058034 | OE & Brain |
| Dr_Taar19s  | zTA30 | 10 | 45656679-45657737 |                    | Brain & OE |
| Dr_Taar19t  |       | 10 | 45660522-45661511 |                    | Brain & OE |
| Dr_Taar19u  | zTA16 | 10 | 45677535-45678581 |                    | Brain      |
| Dr_Taar19v  |       | 10 | 45677589-45678581 |                    | Brain      |
| Dr_Taar20a  | zTA44 | 10 | 45350191-45351246 |                    | Brain & OE |
| Dr_Taar20a1 | zTA23 | 10 | 45491713-45492579 |                    | Brain & OE |
| Dr_Taar20b  | zTA39 | 10 | 45356183-45357130 | ENSDART00000062778 | OE & Brain |
| Dr_Taar20b1 | zTA21 | 10 | 45479796-45480845 |                    | Brain & OE |
| Dr_Taar20c  | zTA45 | 10 | 45397017-45398036 | ENSDART00000076430 | OE & Brain |
| Dr_Taar20c1 |       | 10 | 45487291-45486336 |                    | OE & Brain |
| Dr_Taar20d  | zTA40 | 10 | 45405137-45406132 | ENSDART00000085912 | Brain & OE |
| Dr_Taar20d1 |       | 10 | 45497808-45496853 |                    | Brain & OE |
| Dr_Taar20e  | zTA38 | 10 | 45406138-45405150 |                    | Brain & OE |
| Dr_Taar20f  | zTA41 | 10 | 45369137-45370150 | ENSDART00000046136 | Brain & OE |
| Dr_Taar20g  |       | 10 | 45377510-45378535 | ENSDART00000041600 | OE & Brain |
| Dr_Taar20h  |       | 10 | 45366005-45365017 |                    | OE & Brain |
| Dr_Taar20i  | zTA43 | 10 | 45383272-45384324 |                    | Brain & OE |
| Dr_Taar20j  | zTA53 | 10 | 45432992-45433981 |                    | Brain & OE |
| Dr_Taar20k  | zTA25 | 10 | 45516089-45517060 |                    | OE & Brain |

|            |        |              |                   |                    |            |
|------------|--------|--------------|-------------------|--------------------|------------|
| Dr_Taar20l | zTA57  | 10           | 45423213-45424205 |                    | Brain & OE |
| Dr_Taar20m | zTA24  | 10           | 45525456-45526454 |                    | Brain & OE |
| Dr_Taar20n |        | 10           | 45428757-45427769 |                    | Brain & OE |
| Dr_Taar20o | zTA42  | 10           | 45471587-45472636 |                    | Brain & OE |
| Dr_Taar20p | zTA90+ | 10           | 45466633-45465645 |                    | Brain & OE |
| Dr_Taar20q | zTA91+ | 10           | 45460333-45461919 |                    | Brain & OE |
| Dr_Taar20r | zTA37  | 10           | 45438081-45447488 | ENSDART00000022615 | Brain & OE |
| Dr_Taar20s |        | 10           | 45532540-45531552 |                    | Brain & OE |
| Dr_Taar20t | zTA56  | 10           | 45419797-45420783 | ENSDART00000038407 | OE & Brain |
| Dr_Taar20u | zTA55  | 10           | 45414238-45415200 | ENSDART00000085907 | Brain & OE |
| Dr_Taar20v |        |              | BC093335          |                    | OE & Brain |
| Dr_Taar20w | zTA46  | 10           | 45437982-45438977 |                    | Brain & OE |
| Dr_Taar20x | zTa26  | 10           | 45507567-45508559 |                    | OE & Brain |
| Dr_Taar20y | zTA22  | 10           | 45502431-45501443 |                    | Brain & OE |
| Dr_Taar20z | zTA52  | 10           | 45501436-45502485 |                    | Brain & OE |
|            |        |              |                   |                    |            |
| Ga_Taar21a |        | groupXVIII   | 806192-807403     | ENSGACT00000005640 |            |
| Ga_Taar21b |        | groupXVIII   | 849378-850334     | ENSGACT00000005649 |            |
| Ga_Taar21c |        | groupXVIII   | 864851-865838     | ENSGACT00000005661 |            |
| Ga_Taar22a |        | groupIX      | 13760495-13761558 | ENSGACT00000024727 |            |
| Ga_Taar22b |        | group-I      | 22436982_22436003 |                    |            |
| Ga_Taar23  |        | groupXVI     | 15950422-15951745 | ENSGACT00000010786 |            |
| Ga_Taar24  |        | groupXV      | 16483483-16485039 | ENSGACT00000011049 |            |
| Ga_Taar25a |        | groupXVI     | 17108838_17107707 |                    |            |
| Ga_Taar25b |        | groupXVI     | 16450671-16452078 | ENSGACT00000010998 |            |
| Ga_Taar25c |        | groupXVI     | 16978741-16979885 | ENSGACT00000011316 |            |
| Ga_Taar25d |        | groupXVI     | 16460421-16461727 | ENSGACT00000011007 |            |
| Ga_Taar25e |        | groupXVI     | 16467898-16469661 | ENSGACT00000011022 |            |
| Ga_Taar25f |        | groupXVI     | 16974284-16975596 | ENSGACT00000011311 |            |
| Ga_Taar25g |        | groupXVI     | 16946301-16948367 | ENSGACT00000011304 |            |
| Ga_Taar25h |        | scaffold_37  | 867705-869195     | ENSGACT00000001187 |            |
| Ga_Taar25i |        | scaffold_37  | 830907-832333     | ENSGACT00000001173 |            |
| Ga_Taar25j |        | scaffold_37  | 845277-846439     | ENSGACT00000001174 |            |
| Ga_Taar25k |        | scaffold_37  | 852505-855055     | ENSGACT00000001178 |            |
| Ga_Taar25l |        | scaffold_37  | 880733-881869     | ENSGACT00000001195 |            |
| Ga_Taar26a |        | scaffold_160 | 51365:52762:-1    |                    |            |

|             |  |               |                      |                    |  |
|-------------|--|---------------|----------------------|--------------------|--|
| Ga_Taar26a1 |  | groupXVI      | 16966117-16967188    | ENSGACT00000011310 |  |
| Ga_Taar26b  |  | scaffold_37   | 1893790-1894994      | ENSGACT00000001272 |  |
| Ga_Taar26b1 |  | scaffold_37   | 815923-817008        | ENSGACT00000001171 |  |
| Ga_Taar26c  |  | scaffold_160: | 94133:95530:-1       |                    |  |
| Ga_Taar26d  |  | scaffold_37   | 1868618-1869815      | ENSGACT00000001270 |  |
| Ga_Taar26e  |  | groupXVI      | 17043139_17042020    |                    |  |
| Ga_Taar26f  |  | groupXVI      | 17028081-17029718    | ENSGACT00000011318 |  |
| Ga_Taar26g  |  | groupXVI      | 17077068_17075993    |                    |  |
| Ga_Taar26h  |  | groupXVI      | 4734246_4735368      |                    |  |
| Ga_Taar26i  |  | groupXVI      | 4761489_4762619      |                    |  |
| Ga_Taar26j  |  | groupXVI      | 4753832-4754968      | ENSGACT00000002929 |  |
| Ga_Taar26k  |  | groupXVI      | 4855585-4856789      | ENSGACT00000002944 |  |
| Ga_Taar26l  |  | groupXVI      | 4814442-4815533      | ENSGACT00000002940 |  |
| Ga_Taar26m  |  | scaffold_37   | 1878555:1879952:-1   |                    |  |
| Ga_Taar26n  |  | scaffold_56   | 1059527-1060737      | ENSGACT00000002821 |  |
| Ga_Taar26o  |  | groupXVI      | 17164416_17165546    |                    |  |
| Ga_Taar26p  |  | scaffold_160  | 139282:140697:1      |                    |  |
| Ga_Taar26q  |  | groupXVI      | 17057147-17058154    | ENSGACT00000011320 |  |
| Ga_Taar26r  |  | groupXVI      | 17085255:17086652:1  |                    |  |
| Ga_Taar26s  |  | groupXVI      | 17095712_17094581    |                    |  |
| Ga_Taar26t  |  | groupXVI      | 17020491_17021620    |                    |  |
| Ga_Taar26u  |  | groupXVI      | 17003486_17004615    |                    |  |
| Ga_Taar26v  |  | groupXVI      | 17175154_17176284    |                    |  |
| Ga_Taar26w  |  | groupXVI      | 17119616:17121019:-1 |                    |  |
| Ga_Taar26x  |  | groupXVI      | 17065776-17066988    | ENSGACT00000011323 |  |
| Ga_Taar26y  |  | groupXVI      | 17151885-17152878    | ENSGACT00000011329 |  |
| Ga_Taar26z  |  | groupXVI      | 16449795_16448676    |                    |  |
| Ga_Taar27   |  | groupI        | 27258576-27269505    | ENSGACT00000020298 |  |
|             |  |               |                      |                    |  |
| OI_Taar21a  |  | 24            | 10175766-10176731    | ENSORLT00000019540 |  |
| OI_Taar21b  |  | 24            | 10072258-10074154    | ENSORLT00000019531 |  |
| OI_Taar21c  |  | 24            | 10186887-10187888    | ENSORLT00000019546 |  |
| OI_Taar21d  |  | 24            | 10194348-10195725    | ENSORLT00000019549 |  |
| OI_Taar21e  |  | 24            | 10204903-10205901    | ENSORLT00000019555 |  |
| OI_Taar21f  |  | 24            | 10166806-10167735    | ENSORLT00000019535 |  |
| OI_Taar22   |  | 2             | 30183414-30184613    | ENSORLT00000007813 |  |
| OI_Taar23a  |  | Scaffold691   | 13484-14893          |                    |  |
| OI_Taar23b  |  | 21            | 15078821-15080029    | ENSORLT00000017413 |  |
| OI_Taar23c  |  | scaffold691   | 7458-8583            | ENSORLT00000023953 |  |
| OI_Taar23d  |  | scaffold3620  | 1585-2740            | ENSORLT00000023739 |  |
| OI_Taar23e  |  | scaffold4535  | 1771-2903            | ENSORLT00000024697 |  |

|            |  |               |                     |                    |  |
|------------|--|---------------|---------------------|--------------------|--|
| Ol_Taar23f |  | 21            | 15066726-15068348   | ENSORLT00000017409 |  |
| Ol_Taar23g |  | 21            | 30824724-30825926   | ENSORLT00000022830 |  |
| Ol_Taar23h |  | 21            | 15113170-15114295   | ENSORLT00000017425 |  |
| Ol_Taar23i |  | 21            | 15246610-15248028   |                    |  |
| Ol_Taar23j |  | scaffold2246  | 3196-4302           | ENSORLT00000023320 |  |
| Ol_Taar23k |  | 21            | 15257320_15256218   |                    |  |
| Ol_Taar23l |  | 21            | 15276889_15275788   |                    |  |
| Ol_Taar23m |  | 21            | 15334359_15333269   |                    |  |
| Ol_Taar23n |  | 21            | 15312452-15313546   | ENSORLT00000017451 |  |
| Ol_Taar23o |  | 21            | 15083894-15085278   | ENSORLT00000017421 |  |
| Ol_Taar24a |  | 21            | 30838329-30840233   | ENSORLT00000022832 |  |
| Ol_Taar24b |  | 21            | 30845621-30846947   | ENSORLT00000022836 |  |
| Ol_Taar24c |  | 21            | 30862260-30863356   | ENSORLT00000022838 |  |
|            |  |               |                     |                    |  |
| Md_Taar1   |  | 2             | 407115274-407116293 | ENSMODT00000030995 |  |
| Md_Taar2   |  | 2             | 407094705-407095724 | ENSMODT00000022248 |  |
| Md_Taar3   |  | 2             | 407041839-407042870 | ENSMODT00000030996 |  |
| Md_Taar4a  |  | 2             | 407018009-407016930 |                    |  |
| Md_Taar4b  |  | 2             | 407016970-407029879 | ENSMODT00000030998 |  |
| Md_Taar5   |  | 2             | 406983915-406984946 | ENSMODT00000022251 |  |
| Md_Taar6a  |  | 2             | 406873483-406875111 |                    |  |
| Md_Taar6b  |  | 2             | 406878994-406880013 | ENSMODT00000031001 |  |
| Md_Taar6c  |  | 2             | 406861305-406862345 | ENSMODT00000022260 |  |
| Md_Taar6d  |  | 2             | 406967819-406968859 | ENSMODT00000030999 |  |
| Md_Taar6e  |  | 2             | 406933774-406934850 | ENSMODT00000031000 |  |
| Md_Taar6f  |  | 2             | 406909541-406910617 | ENSMODT00000022259 |  |
| Md_Taar9   |  | 2             | 406713166-406729709 | ENSMODT00000022262 |  |
| Md_Taar9a  |  | 2             | 406798654-406799547 | ENSMODT00000022263 |  |
| Md_Taar9b  |  | 2             | 406818556-406819593 | ENSMODT00000031002 |  |
| Md_Taar9c  |  | 2             | 406834315-406835976 |                    |  |
| Md_Taar9d  |  | 2             | 406852655-406854316 |                    |  |
| Md_Taar9e  |  | 2             | 406777770-406778840 | ENSMODT00000022265 |  |
| Md_Taar9f  |  | 2             | 406728666-406729746 |                    |  |
|            |  |               |                     |                    |  |
| Tr_Taar21a |  | scaffold_2286 | 7867-8688           | SINFRUT00000131749 |  |

|            |  |               |                         |                    |  |
|------------|--|---------------|-------------------------|--------------------|--|
| Tr_Taar21b |  | scaffold_2618 | 2998-3949               | SINFRUT00000181393 |  |
| Tr_Taar21c |  | scaffold_375  | 193436-194398           | SINFRUT00000150779 |  |
| Tr_Taar21d |  | scaffold_2286 | 2710-3675               | SINFRUT00000150777 |  |
| Tr_Taar21e |  | scaffold_682  | 7142-8116               | SINFRUT00000181172 |  |
| Tr_Taar21f |  | scaffold_682  | 15028-15969             | SINFRUT00000175284 |  |
| Tr_Taar22a |  | scaffold_3049 | 7460-8444               | SINFRUT00000168032 |  |
| Tr_Taar22b |  | scaffold_36   | 1263458-1264444         | SINFRUT00000174634 |  |
| Tr_Taar22c |  | scaffold_62   | 988428-989300           | SINFRUT00000171815 |  |
| Tr_Taar27  |  | scaffold_144  | 4933-5793               | SINFRUT00000179744 |  |
| Tr_Taar28a |  | scaffold_2971 | 155-950                 |                    |  |
| Tr_Taar28b |  | scaffold_5473 | 768-1529                | SINFRUT00000181876 |  |
| Tr_Taar28c |  | scaffold_347  | 234123-233001           | SINFRUT00000178656 |  |
| Tr_Taar28d |  | scaffold_55   | 384-1178                | SINFRUT00000183354 |  |
| Tr_Taar28e |  | scaffold_347  | 223711-222590           |                    |  |
| Tr_Taar28f |  | scaffold_7591 | 430-1508                | SINFRUT00000180900 |  |
| Tr_Taar28g |  | scaffold_347  | 183483-182389           |                    |  |
| Tr_Taar28h |  | scaffold_347  | 190927-189849           |                    |  |
|            |  |               |                         |                    |  |
| Tn_Taar21a |  | 14            | 830088-830960           | GSTENT00035509001  |  |
| Tn_Taar21b |  | 14            | 869461-878434           | GSTENT00035507001  |  |
| Tn_Taar21c |  | Un_random     | 124477975-<br>124478871 | GSTENT00011223001  |  |
| Tn_Taar22a |  | 3             | 2466479-2465399         |                    |  |
| Tn_Taar22b |  | 3             | 2461859-2460719         |                    |  |
| Tn_Taar22c |  | 3             | 2455140-2454359         |                    |  |
| Tn_Taar22d |  | 3             | 2457239-2456279         |                    |  |
| Tn_Taar22e |  | 3             | 2468939-2467919         | GSTENT00015819001  |  |
| Tn_Taar22f |  | 18            | 5142103-5142852         | GSTENT00035829001  |  |
| Tn_Taar27a |  | Un_random     | 126873732-<br>126874616 | GSTENT00011732001  |  |
| Tn_Taar27b |  | Un_random     | 126880750-<br>126881709 | GSTENT00011734001  |  |
| Tn_Taar27c |  | Un_random     | 126905659-<br>126906669 | GSTENT00011735001  |  |
| Tn_Taar27d |  | Un_random     | 42642638-42643618       | GSTENT00009214001  |  |
| Tn_Taar27e |  | Un_random     | 113714467-<br>113715447 | GSTENT00009350001  |  |
| Tn_Taar27f |  | Un_random     | 105520168-<br>105521166 | GSTENT00007835001  |  |
| Tn_Taar28a |  | Un_random     | 45834268-45835045       | GSTENT00013017001  |  |
| Tn_Taar28b |  | Un_random     | 117442902-<br>117443705 | GSTENT00009988001  |  |
| Tn_Taar28c |  | Un_random     | 91619317-91620063       | GSTENT00005517001  |  |
|            |  |               |                         |                    |  |
| RnTaar1    |  | 1             | 22045364-22046362       | ENSRNOT00000021510 |  |
| RnTaar2    |  | 1             | 22027912-22028907       | ENSRNOT00000035424 |  |

|           |  |    |                         |                    |  |
|-----------|--|----|-------------------------|--------------------|--|
| RnTaar3   |  | 1  | 22018606-22019634       | ENSRNOT00000035539 |  |
| RnTaar4   |  | 1  | 22008118-22009161       | ENSRNOT00000047810 |  |
| RnTaar5   |  | 1  | 21996992-21998005       | ENSRNOT00000061209 |  |
| RnTaar6   |  | 1  | 21984658-21985695       | ENSRNOT00000021529 |  |
| RnTaar7a  |  | 1  | 21977118-21978194       | ENSRNOT00000021545 |  |
| RnTaar7b  |  | 1  | 21967019-21968095       | ENSRNOT00000021559 |  |
| RnTaar7c  |  | 1  | 21955553-21956629       | ENSRNOT00000050763 |  |
| RnTaar7d  |  | 1  | 21934361-21935437       | ENSRNOT00000051416 |  |
| RnTaar7e  |  | 1  | 21926752-21927828       | ENSRNOT00000046379 |  |
| RnTaar7g  |  | 1  | 21912398-21913474       | ENSRNOT00000044271 |  |
| RnTaar7h  |  | 1  | 21898531-21899607       | ENSRNOT00000043436 |  |
| RnTaar8a  |  | 1  | 21857801-21858925       | ENSRNOT00000044098 |  |
| RnTaar8b  |  | 1  | 21829913-21830947       | ENSRNOT00000045563 |  |
| RnTaar8c  |  | 1  | 21814634-21815668       | ENSRNOT00000043157 |  |
| RnTaar9   |  | 1  | 21799696-21800742       | ENSRNOT00000038523 |  |
|           |  |    |                         |                    |  |
| Mm_Taar1  |  | 10 | 23609822-23610820       | ENSMUST00000051532 |  |
| Mm_Taar2  |  | 10 | 23630004-23630999       | ENSMUST00000079134 |  |
| Mm_Taar3  |  | 10 | 23638974-23640005       | ENSMUST00000045152 |  |
| Mm_Taar4  |  | 10 | 23649910-23650953       | ENSMUST00000092660 |  |
| Mm_Taar5  |  | 10 | 23660122-23661135       | ENSMUST00000092659 |  |
| Mm_Taar6  |  | 10 | 23674025-23675062       | ENSMUST00000057080 |  |
| Mm_Taar7a |  | 10 | 23681821-23682897       | ENSMUST00000078532 |  |
| Mm_Taar7b |  | 10 | 23689355-23690431       | ENSMUST00000092658 |  |
| Mm_Taar7d |  | 10 | 23716638-23717714       | ENSMUST00000092657 |  |
| Mm_Taar7e |  | 10 | 23727030-23728106       | ENSMUST00000092656 |  |
| Mm_Taar7f |  | 10 | 23738926-23740002       | ENSMUST00000071691 |  |
| Mm_Taar8a |  | 10 | 23765916-23766950       | ENSMUST00000051133 |  |
| Mm_Taar8b |  | 10 | 23780676-23781710       | ENSMUST00000092655 |  |
| Mm_Taar8c |  | 10 | 23790294-23791328       | ENSMUST00000092654 |  |
| Mm_Taar9  |  | 10 | 23797904-23798950       | ENSMUST00000041180 |  |
|           |  |    |                         |                    |  |
| Bt_Taar1  |  | 9  | 63844020-63845624       |                    |  |
| Bt_Taar2  |  | 9  | 63821486-63823081       |                    |  |
| Bt_Taar3  |  | 9  | 63810823-63812451       |                    |  |
| Bt_Taar4  |  | 9  | 63796757-63802538       |                    |  |
| Bt_Taar5  |  | 9  | 63790900-63791913       | ENSBTAT00000010332 |  |
| Bt_Taar6a |  | Un | 263025242-<br>263026315 | ENSBTAT00000047909 |  |
| Bt_Taar6b |  | 9  | 63472554-63473591       | ENSBTAT00000046084 |  |
| Bt_Taar7a |  | Un | 293821629-<br>293822690 | ENSBTAT00000039034 |  |

|                          |       |              |                         |                    |  |
|--------------------------|-------|--------------|-------------------------|--------------------|--|
| Bt_Taar7b                |       | 9            | 63416496-63417569       | ENSBTAT00000037774 |  |
| Bt_Taar7c                |       | 9            | 63450500-63452136       | ENSBTAT00000011316 |  |
| Bt_Taar8a                |       | 9            | 63492912-63493937       | ENSBTAT00000020857 |  |
| Bt_Taar8b                |       | Un           | 262942450-<br>262943484 | ENSBTAT00000008724 |  |
| Bt_Taar9                 |       | 9            | 63508158-63508949       | ENSBTAT00000004932 |  |
|                          |       |              |                         |                    |  |
| Hs_Taar1                 |       | 6            | 133007816-<br>133008835 | ENsT00000275216    |  |
| Hs_Taar2                 |       | 6            | 132979982-<br>132987107 | ENsT00000367931    |  |
| Hs_Taar5                 |       | 6            | 132951505-<br>132952518 | ENsT00000258034    |  |
| Hs_Taar6                 |       | 6            | 132933205-<br>132934182 | ENsT00000367934    |  |
| Hs_Taar8                 |       | 6            | 132915525-<br>132916553 | ENsT00000275200    |  |
| Hs_Taar9                 |       | 6            | 132901120-<br>132902168 | ENsT00000340640    |  |
|                          |       |              |                         |                    |  |
| Xt_Taar1                 |       | scaffold_172 | 2058717-2059793         | ENSXETT00000000206 |  |
| Xt_Taar4a                |       | scaffold_172 | 2081286-2082349         | ENSXETT00000000188 |  |
| Xt_Taar4b                |       | scaffold_172 | 2072396-2073450         | ENSXETT00000000192 |  |
|                          |       |              |                         |                    |  |
| Gg_Taar1                 |       | 3            | 58772958-58773950       | ENSGALT00000022674 |  |
| Gg_Taar2                 |       | 3            | 58790520-58791542       | ENSGALT00000019656 |  |
| Gg_Taar5                 |       | 3            | 58802258-58803280       | ENSGALT00000022676 |  |
|                          |       |              |                         |                    |  |
| Cm_Taar1                 |       | WGS          |                         | AAVX01005735       |  |
| Cm_Taar2*                |       | WGS          |                         | AAVX01045569       |  |
|                          |       |              |                         |                    |  |
| <b>Outgroups:</b>        |       |              |                         |                    |  |
| <b>Aminergic R.tors:</b> |       |              |                         |                    |  |
| Dr_serotonin R. 2B       | Htr2b |              |                         | DQ864496           |  |
| Dr_histamine R. H2       | hrh2  |              |                         | NM_001045338       |  |
| Dr_dopamine R. D2a       | drd2a |              |                         | NM_183068          |  |
| Mm_histamine R. H3       | Hrh3  |              |                         | NM_133849          |  |
| Mm_dopamine R. 3         | Drd3  |              |                         | NM_007877          |  |
| Mm_serotonin R. 5A       | Htr5a |              |                         | NM_008314          |  |
| Mm_dopamine R. D1A       | Drd1a |              |                         | NM_010076          |  |
| Mm_adrenergic R. beta 1  | Adrb1 |              |                         | NM_007419          |  |
| Rn_serotonin R. 2A       | Htr2a |              |                         | NM_017254          |  |
| Rn_histamine R. H 2      | Hrh2  |              |                         | NM_012965          |  |
| Rn_dopamine R. D3        | Drd3  |              |                         | NM_017140          |  |
| Rn_adrenergic R. beta 2  | Adrb2 |              |                         | NM_012492          |  |
| <b>OR:</b>               |       |              |                         |                    |  |

|                                             |  |    |                         |                    |  |
|---------------------------------------------|--|----|-------------------------|--------------------|--|
| Dr_OR131                                    |  | 15 | 29704040 - 29705023     | ENSDART00000100030 |  |
| Dr_OR22                                     |  | 15 | 29659462-29660635       | ENSDART00000009390 |  |
| Mm_OR121                                    |  | 17 | 37888801-37889766       | ENSMUST00000074555 |  |
| Mm_OR446                                    |  | 6  | 42877232-42878158       | ENSMUST00000101461 |  |
| Rn_ORi15                                    |  | 10 | 60267950-60268897       | ENSRNOT00000040777 |  |
| <b>Lamprey AmR:</b>                         |  |    |                         |                    |  |
| Contig11088:617:2278                        |  |    |                         | GENSCAN00000071721 |  |
| Contig11088:12981:14642                     |  |    |                         | GENSCAN00000145282 |  |
| Contig1988:18760:20379                      |  |    |                         | GENSCAN00000086194 |  |
| Contig1988:36280:37854                      |  |    |                         | GENSCAN00000080186 |  |
| Contig25386:1986:3629:                      |  |    |                         | GENSCAN00000100832 |  |
| Contig2410:15193:16920                      |  |    |                         | GENSCAN00000068085 |  |
| Contig32780:2648:4291                       |  |    |                         | GENSCAN00000007566 |  |
| Contig29539:762:2393                        |  |    |                         | GENSCAN00000093854 |  |
| Contig39824:7093:8748                       |  |    |                         | GENSCAN00000010072 |  |
| Contig6569:10667:15719                      |  |    |                         | GENSCAN00000142135 |  |
| Contig19989:8020:9663                       |  |    |                         | GENSCAN00000098663 |  |
| Contig39552:7626:9284                       |  |    |                         | GENSCAN00000077187 |  |
| Contig34843:480:2114                        |  |    |                         | GENSCAN00000091849 |  |
| Contig58368:4024:5520                       |  |    |                         | GENSCAN00000114105 |  |
| Contig8493:19657:21222                      |  |    |                         | GENSCAN00000148282 |  |
| Contig8493:16826:18391                      |  |    |                         | GENSCAN00000148281 |  |
| Contig56958:2841:4508                       |  |    |                         | GENSCAN00000030920 |  |
| supercontig:PMAR3:<br>Contig4553:9517:11127 |  |    |                         | GENSCAN00000087423 |  |
| supercontig:PMAR3:<br>Contig6110:8321:9970  |  |    |                         | GENSCAN00000001971 |  |
| supercontig:PMAR3:<br>Contig17881:4845:6429 |  |    |                         | GENSCAN00000018535 |  |
| Contig32699:8482:9981                       |  |    |                         | GENSCAN00000016801 |  |
| Contig17881:15313:16914                     |  |    |                         | GENSCAN00000129481 |  |
| Contig6569:1523:3133                        |  |    |                         | GENSCAN00000144047 |  |
|                                             |  |    |                         |                    |  |
| <b>Pseudo genes:</b>                        |  |    |                         |                    |  |
| <b>Zebrafish:</b>                           |  |    |                         |                    |  |
|                                             |  |    | 243399754-<br>243399774 |                    |  |
|                                             |  | 1  |                         |                    |  |
|                                             |  | 13 | 351799-352842           |                    |  |
|                                             |  | 20 | 45965163-45966302       |                    |  |
|                                             |  | 10 | 36614089-36614794       |                    |  |
| <b>Medaka:</b>                              |  |    |                         |                    |  |
|                                             |  | 7  | 5425949-5488965         | ENSORLT00000003004 |  |
| <b>Mouse:</b>                               |  |    |                         |                    |  |

|               |          |  |  |           |  |
|---------------|----------|--|--|-----------|--|
|               | Taar7c_P |  |  | AY702333  |  |
| <b>Human:</b> |          |  |  |           |  |
|               | TAAR3_P  |  |  | AF112461  |  |
|               | TAAR4_P  |  |  | NG_004855 |  |
|               | TAAR7_P  |  |  | NG_004854 |  |
| <b>Rat:</b>   |          |  |  |           |  |
|               | TAAR7i_P |  |  | AY702324  |  |
|               | TAAR7f_P |  |  | AY702323  |  |

Nomenclature, genomic location, accession number, and EST hits are shown. Synonyms taken from ref. 1; asterisk, Cm2 is ancestral to several TAAR subfamilies, including TAAR2. HsTAAR3 is annotated as intact sequence, but is retrieved as pseudogene from both human and chimpanzee genome assemblies. Genomic location and EST hits (OE, olfactory epithelium) were retrieved from the Ensembl database (2), release 47, based on assembly zv7, August 2007 for zebrafish, assembly Fugu 4.0, February 2006 for *Takifugu rubripes*, assembly HdrR, October 2006 for medaka, assembly BROAD S1, August 2006 for stickleback, and assembly TETRAODON 7, October 2004 for *Tetraodon nigroviridis*.

1. Hashiguchi Y, Nishida M (2007) Evolution of trace amine associated receptor (TAAR) gene family in vertebrates: Lineage-specific expansions and degradations of a second class of vertebrate chemosensory receptors expressed in the olfactory epithelium. *Mol Biol Evol* 24: 2099-2107.
2. Yokoyama S, Tada T, Zhang H, Britt L (2008) Elucidation of phenotypic adaptations: Molecular analyses of dim-light vision proteins in vertebrates. *Proc Natl Acad Sci USA* 105:13480-13485
