# Supplementary material
Source: PubMed Central journal article supplement (PMC2657432)
Supplement: 0803229106_ST3_PDF.pdf [file 0803229106_ST3_PDF.pdf]

**Table S3. Global dN/dS values of TAAR subfamilies**

|                  | ClassI |      |      |      | ClassII |      |      |      |      |      |      |      |      |      | ClassIII |      |      |      |      |      |      |      |      |      |      |      |
|------------------|--------|------|------|------|---------|------|------|------|------|------|------|------|------|------|----------|------|------|------|------|------|------|------|------|------|------|------|
| TAAR             | 1      | 10   | 21   | 27   | 2       | 3    | 4    | 5    | 6    | 7    | 8    | 9    | 12   | 13   | 14       | 16   | 17   | 18   | 19   | 20   | 22   | 23   | 24   | 25   | 26   | 28   |
| <b>dN/dS</b>     | 0.19   | 0.25 | 0.25 | 0.32 | 0.09    | 0.10 | 0.13 | 0.11 | 0.17 | 0.25 | 0.20 | 0.15 | 0.27 | 0.29 | 0.39     | 0.27 | 0.41 | 0.35 | 0.45 | 0.49 | 0.30 | 0.34 | 0.24 | 0.54 | 0.80 | 0.56 |
| <b>Average</b>   | 0.26   |      |      |      | 0.18    |      |      |      |      |      |      |      |      |      | 0.43     |      |      |      |      |      |      |      |      |      |      |      |
| <b>n</b>         | 4      |      |      |      | 10      |      |      |      |      |      |      |      |      |      | 12       |      |      |      |      |      |      |      |      |      |      |      |
| <b>Std Error</b> | 0.03   |      |      |      | 0.02    |      |      |      |      |      |      |      |      |      | 0.04     |      |      |      |      |      |      |      |      |      |      |      |

Global dN/dS values are shown for each TAAR subfamily. For each class of *taar* genes the average global value, *n*, and standard error are shown.
