# Supplementary material
Source: PubMed Central journal article supplement (PMC2657432)
Supplement: 0803229106_ST5_PDF.pdf [file 0803229106_ST5_PDF.pdf]

**Table S5. Selective pressure in *Danio rerio* odorant receptor genes**

| Global dN/dS values of OR subfamilies                                |      |      |     |      |      |      |      |     |      |     |      |     |      |     |
|----------------------------------------------------------------------|------|------|-----|------|------|------|------|-----|------|-----|------|-----|------|-----|
| OR subfamily                                                         | OR5  | OR6  | OR7 | OR8  | OR10 | OR15 | OR21 |     |      |     |      |     |      |     |
| dN/dS                                                                | 0.16 | 0.26 | 0.3 | 0.34 | 0.34 | 0.27 | 0.29 |     |      |     |      |     |      |     |
| Number of positively and negatively selected sites in OR subfamilies |      |      |     |      |      |      |      |     |      |     |      |     |      |     |
| OR subfamily                                                         | OR5  |      | OR6 |      | OR7  |      | OR8  |     | OR10 |     | OR15 |     | OR21 |     |
| Significant Level                                                    | 0.1  | 0.2  | 0.1 | 0.2  | 0.1  | 0.2  | 0.1  | 0.2 | 0.1  | 0.2 | 0.1  | 0.2 | 0.1  | 0.2 |
| # pos. sites                                                         | 0    | 0    | 0   | 0    | 0    | 1    | 0    | 0   | 0    | 1   | 1    | 1   | 2    | 5   |
| # neg. sites                                                         | 0    | 19   | 1   | 3    | 7    | 27   | 6    | 29  | 84   | 131 | 178  | 218 | 77   | 138 |
